# Supplementary material
Source: PubMed Central journal article supplement (PMC3652964)
Supplement: supp_121592_five-young-1-at.pdf [file supp_121592_five-young-1-at.pdf]

### Appendix 1: Variation in cytochrome P450 isoenzyme 2D6 (CYP2D6) phenotype by ethnicity

Tramadol is converted by CYP2D6 to an active opioid metabolite (M1). The CYP2D6 phenotype varies greatly between individuals. The activity of CYP2D6 influences the amount of opioid produced. Even among patients with functional CYP2D6, concurrent use of strong CYP2D6 inhibitors (e.g., fluoxetine, paroxetine, bupropion and ritonavir) will render patients unable to convert tramadol to M1. Values in the table represent the estimated prevalence of CYP2D6 alleles in various ethnic groups. Phenotype results from the combination of alleles present in an individual. [Reprinted, with permission, from Ingelman-Sundberg M. Genetic polymorphisms of cytochrome P450 2D6 (CYP2D6): clinical consequences, evolutionary aspects and functional diversity. *Pharmacogenomics J* 2005;5:6-13. Copyright © 2005 Macmillan Publishers Ltd.]

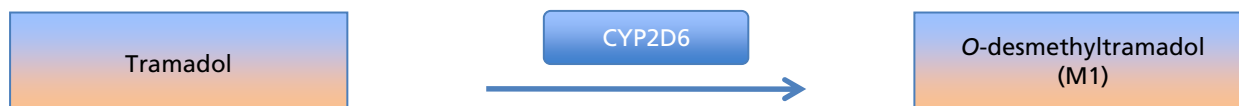

| Allele variant | Mutation           | Consequence                     | Allele frequency, % |        |                |                               |
|----------------|--------------------|---------------------------------|---------------------|--------|----------------|-------------------------------|
|                |                    |                                 | Caucasians          | Asians | Black Africans | Ethiopians and Saudi Arabians |
| CYP2D6 *2xn    | Gene duplication   | Increased enzyme activity       | 1–5                 | 0–2    | 2              | 10–16                         |
| CYP2D6 *4      | Defective splicing | Inactive enzyme                 | 12–21               | 1      | 2              | 1–4                           |
| CYP2D6 *5      | Gene deletion      | No enzyme                       | 2–7                 | 6      | 4              | 1–3                           |
| CYP2D6 *10     | Point mutations    | Unstable enzyme                 | 1–2                 | 51     | 6              | 3–9                           |
| CYP2D6 *17     | Point mutations    | Altered affinity for substrates | 0                   | 0      | 20–35          | 3–9                           |
